# Supplementary material for: Selenium-Fortified Kombucha–Pollen Beverage by In Situ Biosynthesized Selenium Nanoparticles with High Biocompatibility and Antioxidant Activity
Source: MDPI journal article supplement (doi:10.3390/antiox12091711), 2023-09-02
Supplement: s1 [file s1]

## Supplementary Materials

**Table S1.** Experimental design for optimizing the production of SeNPs from Kombucha fermented pollen.

| Run | Factor A<br>(SCOBY) | Factor B<br>(Pollen) | Factor C<br>(Na <sub>2</sub> SeO <sub>3</sub> ) | TPC<br>(µg/mL) | TFC<br>(µg/mL) | HAT<br>(µg/mL) | DPPH<br>(µM) | FRAP<br>(µM) | CUPRAC<br>(µM) | Si<br>(mg/L) | Se <sup>0</sup><br>(mM) | Se <sup>0</sup><br>yield<br>(%) |
|-----|---------------------|----------------------|-------------------------------------------------|----------------|----------------|----------------|--------------|--------------|----------------|--------------|-------------------------|---------------------------------|
| 1   | 15                  | 15                   | 190                                             | 8.602          | 2.056          | 3.587          | 436.5        | 1720         | 695.7          | 5            | 2.043                   | 55.80                           |
| 2   | 30                  | 5                    | 190                                             | 19.03          | 4.509          | 12.84          | 733.6        | 4094         | 1643           | 4.5          | 0                       | 0                               |
| 3   | 30                  | 15                   | 370                                             | 8.671          | 2.056          | 3.819          | 462.1        | 1754         | 995.5          | 5            | 1.273                   | 17.86                           |
| 4   | 30                  | 15                   | 190                                             | 13.44          | 2.294          | 4.282          | 490.3        | 1374         | 1032           | 8            | 1.678                   | 45.84                           |
| 5   | 30                  | 5                    | 190                                             | 17.27          | 4.104          | 16.04          | 719.8        | 3779         | 1313           | 4            | 0                       | 0                               |
| 6   | 30                  | 15                   | 10                                              | 25.54          | 5.196          | 19.09          | 738.4        | 3726         | 1723           | 8            | 0                       | 0                               |
| 7   | 30                  | 15                   | 10                                              | 27.55          | 4.541          | 25.27          | 646.7        | 2764         | 1531           | 7            | 0                       | 0                               |
| 8   | 15                  | 5                    | 10                                              | 28.33          | 4.353          | 19.79          | 740.3        | 3414         | 1477           | 7            | 0                       | 0                               |
| 9   | 30                  | 25                   | 190                                             | 15.18          | 3.542          | 8.680          | 677.5        | 3044         | 1140           | 10           | 3.456                   | 94.38                           |
| 10  | 30                  | 15                   | 190                                             | 12.26          | 2.343          | 4.861          | 501.9        | 1227         | 1014           | 5            | 1.694                   | 46.27                           |
| 11  | 30                  | 15                   | 190                                             | 8.045          | 1.769          | 4.097          | 514.4        | 1389         | 984.3          | 5            | 1.980                   | 54.07                           |
| 12  | 30                  | 25                   | 190                                             | 18.19          | 3.692          | 10.67          | 701.9        | 3410         | 1122           | 13           | 3.638                   | 99.36                           |
| 13  | 15                  | 15                   | 190                                             | 9.262          | 2.468          | 4.050          | 569.8        | 1564         | 801.8          | 6            | 1.940                   | 52.99                           |
| 14  | 45                  | 5                    | 370                                             | 26.24          | 4.884          | 21.41          | 723.0        | 648.5        | 1840           | 7            | 0                       | 0                               |
| 15  | 15                  | 5                    | 10                                              | 28.41          | 4.272          | 24.37          | 654.4        | 2634         | 1339           | 6            | 0                       | 0                               |
| 16  | 45                  | 5                    | 370                                             | 26.63          | 5.065          | 25.57          | 719.8        | 864          | 1968           | 5            | 0                       | .00                             |
| 17  | 30                  | 15                   | 190                                             | 11.59          | 1.875          | 4.513          | 642.3        | 1032         | 1204           | 5            | 2.003                   | 54.72                           |
| 18  | 45                  | 25                   | 10                                              | 20.19          | 4.335          | 12.15          | 712.1        | 2633         | 1248           | 9            | 0                       | 0                               |
| 19  | 15                  | 25                   | 370                                             | 12.24          | 2.718          | 4.745          | 492.9        | 1314         | 712.4          | 9            | 3.115                   | 43.68                           |
| 20  | 30                  | 15                   | 190                                             | 12.89          | 3.136          | 6.25           | 682.6        | 1453         | 1170           | 6            | 2.242                   | 61.22                           |
| 21  | 45                  | 15                   | 190                                             | 11.08          | 2.606          | 4.513          | 592.3        | 1573         | 742.2          | 8            | 0                       | 0                               |
| 22  | 45                  | 25                   | 10                                              | 17.20          | 3.829          | 12.15          | 709.6        | 2389         | 1286           | 9            | 0                       | 0                               |
| 23  | 30                  | 15                   | 370                                             | 9.193          | 2.194          | 4.166          | 540.3        | 1954         | 969.4          | 5            | 1.535                   | 21.53                           |
| 24  | 15                  | 25                   | 370                                             | 12.89          | 2.855          | 4.166          | 539.1        | 1139         | 768.3          | 6            | 2.861                   | 40.12                           |
| 25  | 45                  | 15                   | 190                                             | 12.47          | 2.824          | 3.356          | 600.6        | 1714         | 772.0          | 5            | 0                       | 0                               |

**Table S2.** R<sup>2</sup>, Adjusted R<sup>2</sup> from the ANOVA analysis.

|                       | R <sup>2</sup> | Adjusted R <sup>2</sup> |
|-----------------------|----------------|-------------------------|
| TPC                   | 0.971          | 0.957                   |
| TFC                   | 0.873          | 0.83                    |
| HAT                   | 0.96           | 0.936                   |
| DPPH                  | 0.69           | 0.628                   |
| FRAP                  | 0.663          | 0.574                   |
| CUPRAC                | 0.952          | 0.924                   |
| Si                    | 0.649          | 0.578                   |
| Se <sup>0</sup>       | 0.838          | 0.815                   |
| Se <sup>0</sup> yield | 0.698          | 0.655                   |

Table S3. Coded equation.

| Coded equation                                                                                                                                                                                     |  |
|----------------------------------------------------------------------------------------------------------------------------------------------------------------------------------------------------|--|
| $\text{TPC} = 11.81 + 1.17 \times A - 0.73 \times B - 8.80 \times C - 6.79 \times AB + 5.15 \times AC - 1.56 \times A^2 + 5.50 \times B^2 + 5.81 \times C^2$                                       |  |
| $\text{TFC} = 2.53 + 0.40 \times A - 0.51 \times B - 1.37 \times C - 1.21 \times AB + 1.07 \times B^2 + 0.60 \times C^2$                                                                           |  |
| $\text{HAT} = 5.72 + 0.05 \times A - 2.38 \times B - 9.09 \times C - 7.52 \times AB + 4.85 \times AC - 2.21 \times BC - 2.42 \times A^2 + 5.75 \times B^2 + 6.78 \times C^2$                       |  |
| $\text{DPPH} = 570.68 + 52.02 \times A - 38.16 \times B - 60.36 \times C + 106.37 \times B^2$                                                                                                      |  |
| $\text{FRAP} = 2078.04 - 163.624 \times A - 125.28 \times B - 823.85 \times C - 941.83 \times A^2 + 996.81 \times B^2$                                                                             |  |
| $\text{CUPRAC} = 1050.24 + 4.18 \times A - 173.60 \times B - 322.54 \times C - 314.92 \times AB + 152.77 \times AC - 251.68 \times BC - 277.92 \times A^2 + 274.17 \times B^2 + 274.13 \times C^2$ |  |
| $\text{Si} = 6.68 + 0.33 \times A + 3.75 \times B - 0.75 \times C + 2.75 \times AC$                                                                                                                |  |
| $\text{Se}^0 = 1.59 + 1.08 \times B + 0.87 \times C + 0.91 \times BC - 0.71 \times C^2$                                                                                                            |  |
| $\text{Se}^0 \text{ yield} = 43.43 + 19.97 \times B + 12.25 \times C + 12.86 \times BC - 31.17 \times C^2$                                                                                         |  |

Table S4. Pearson correlation for the responses of the RSM experimental design.

|                       |                     | TPC      | TFC      | HAT      | DPPH    | FRAP    | CUPRAC   | Si     | Se <sup>0</sup> | Se <sup>0</sup> yield |
|-----------------------|---------------------|----------|----------|----------|---------|---------|----------|--------|-----------------|-----------------------|
| TPC                   | Pearson correlation | 1        | 0.916**  | 0.960**  | 0.737** | 0.407*  | 0.832**  | 0.192  | -0.568**        | -0.512**              |
|                       | Sig. (2-tailed)     |          | 0.000    | 0.000    | 0.000   | 0.044   | 0.000    | 0.358  | 0.003           | 0.009                 |
|                       | N                   | 25       | 25       | 25       | 25      | 25      | 25       | 25     | 25              | 25                    |
| TFC                   | Pearson correlation | 0.916**  | 1        | 0.898**  | 0.844** | 0.517** | 0.843**  | 0.218  | -0.566**        | -0.516**              |
|                       | Sig. (2-tailed)     | 0.000    |          | 0.000    | 0.000   | 0.008   | 0.000    | 0.294  | 0.003           | 0.008                 |
|                       | N                   | 25       | 25       | 25       | 25      | 25      | 25       | 25     | 25              | 25                    |
| HAT                   | Pearson correlation | 0.960**  | 0.898**  | 1        | 0.703** | 0.380   | 0.861**  | 0.067  | -0.600**        | -0.537**              |
|                       | Sig. (2-tailed)     | 0.000    | 0.000    |          | 0.000   | 0.061   | 0.000    | 0.749  | 0.002           | 0.006                 |
|                       | N                   | 25       | 25       | 25       | 25      | 25      | 25       | 25     | 25              | 25                    |
| DPPH                  | Pearson correlation | 0.737**  | 0.844**  | 0.703**  | 1       | 0.546** | 0.767**  | 0.238  | -0.466*         | -0.343                |
|                       | Sig. (2-tailed)     | 0.000    | 0.000    | 0.000    |         | 0.005   | 0.000    | 0.252  | 0.019           | 0.093                 |
|                       | N                   | 25       | 25       | 25       | 25      | 25      | 25       | 25     | 25              | 25                    |
| FRAP                  | Pearson correlation | 0.407*   | 0.517**  | 0.380    | 0.546** | 1       | 0.316    | 0.231  | -0.242          | -0.164                |
|                       | Sig. (2-tailed)     | 0.044    | 0.008    | 0.061    | 0.005   |         | 0.124    | 0.266  | 0.243           | 0.433                 |
|                       | N                   | 25       | 25       | 25       | 25      | 25      | 25       | 25     | 25              | 25                    |
| CUPRAC                | Pearson correlation | 0.832**  | 0.843**  | 0.861**  | 0.767** | 0.316   | 1        | -0.031 | -0.557**        | -0.458*               |
|                       | Sig. (2-tailed)     | 0.000    | 0.000    | 0.000    | 0.000   | 0.124   |          | 0.885  | 0.004           | 0.021                 |
|                       | N                   | 25       | 25       | 25       | 25      | 25      | 25       | 25     | 25              | 25                    |
| Si                    | Pearson correlation | 0.192    | 0.218    | 0.067    | 0.238   | 0.231   | -0.031   | 1      | 0.325           | 0.353                 |
|                       | Sig. (2-tailed)     | 0.358    | 0.294    | 0.749    | 0.252   | 0.266   | 0.885    |        | 0.112           | 0.083                 |
|                       | N                   | 25       | 25       | 25       | 25      | 25      | 25       | 25     | 25              | 25                    |
| Se <sup>0</sup>       | Pearson correlation | -0.568** | -0.566** | -0.600** | -0.466* | -0.242  | -0.557** | 0.325  | 1               | 0.942**               |
|                       | Sig. (2-tailed)     | 0.003    | 0.003    | 0.002    | 0.019   | 0.243   | 0.004    | 0.112  |                 | 0.000                 |
|                       | N                   | 25       | 25       | 25       | 25      | 25      | 25       | 25     | 25              | 25                    |
| Se <sup>0</sup> yield | Pearson correlation | -0.512** | -0.516** | -0.537** | -0.343  | -0.164  | -0.458*  | 0.353  | 0.942**         | 1                     |
|                       | Sig. (2-tailed)     | 0.009    | 0.008    | 0.006    | 0.093   | 0.433   | 0.021    | 0.083  | 0.000           |                       |
|                       | N                   | 25       | 25       | 25       | 25      | 25      | 25       | 25     | 25              | 25                    |

\*\* . Correlation is significant at the 0.01 level (2-tailed); \* . Correlation is significant at the 0.05 level (2-tailed).

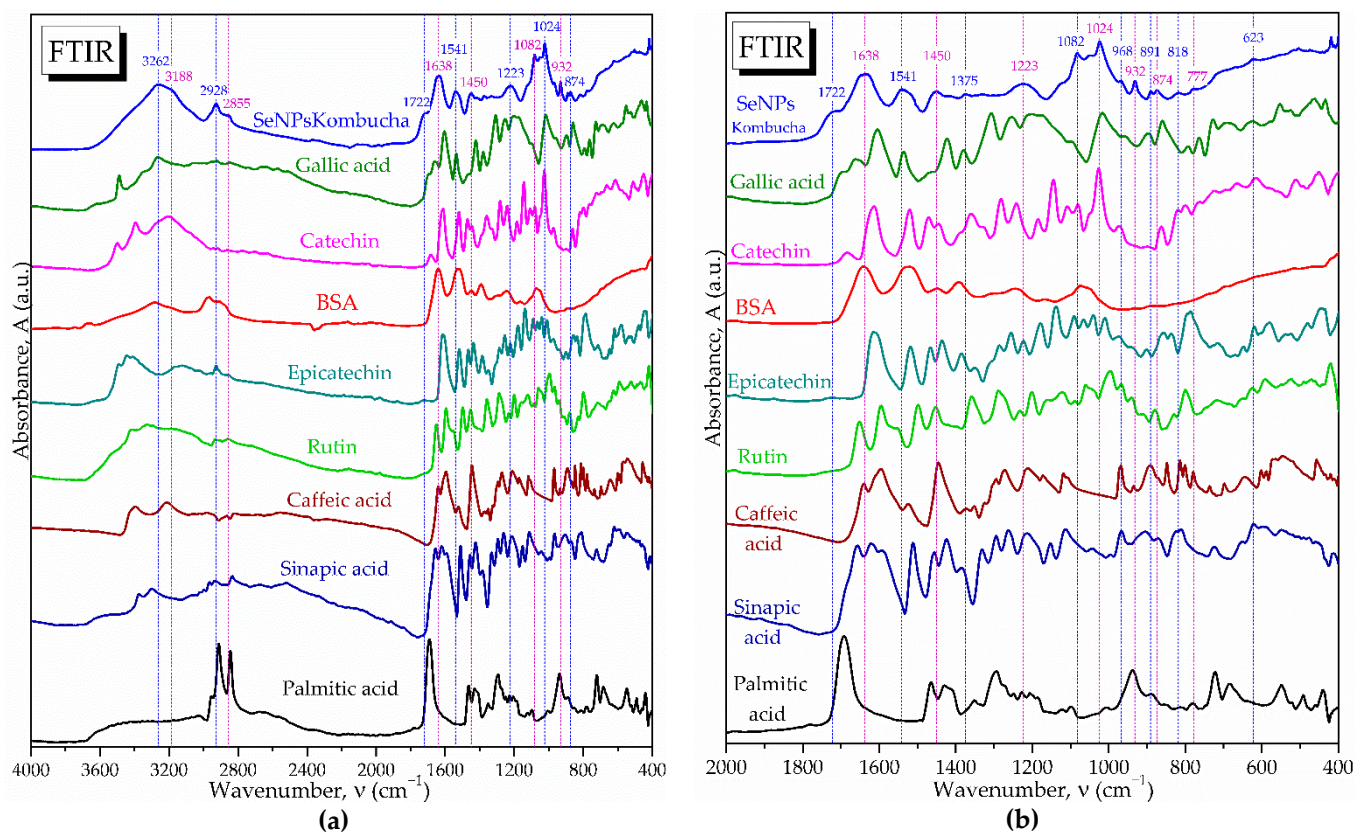

**Figure S1.** FTIR analysis of SeNPs Kombucha in comparison with different compounds: (a) Full spectral range; (b) Fingerprint region.

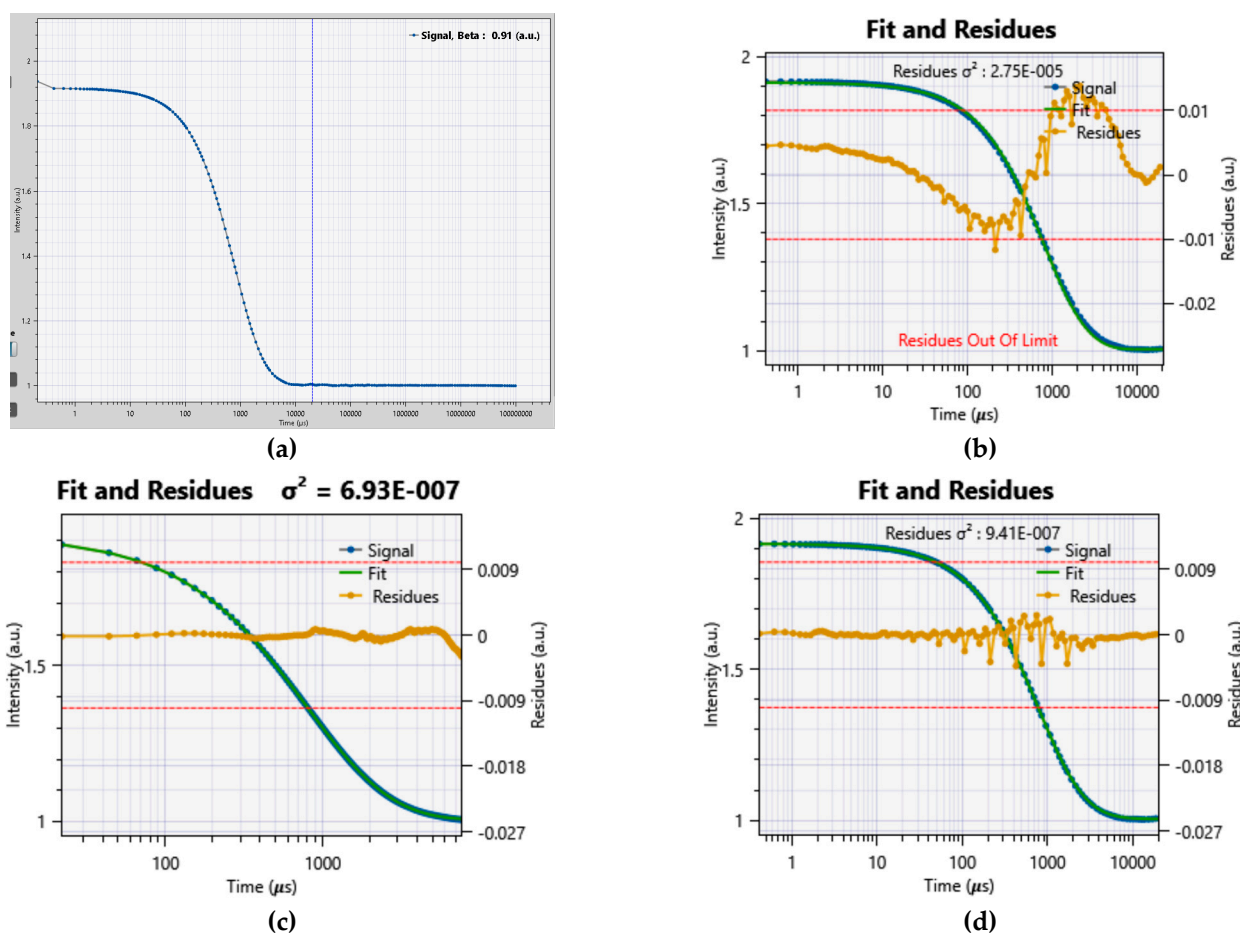

**Figure S2.** DLS analysis: (a) autocorrelation function for SeNPs Kombucha; (b) simulation of autocorrelation function for Cumulants method; (c) simulation of autocorrelation function for Pade Laplace (PL) method; (d) simulation of autocorrelation function for SBL method.

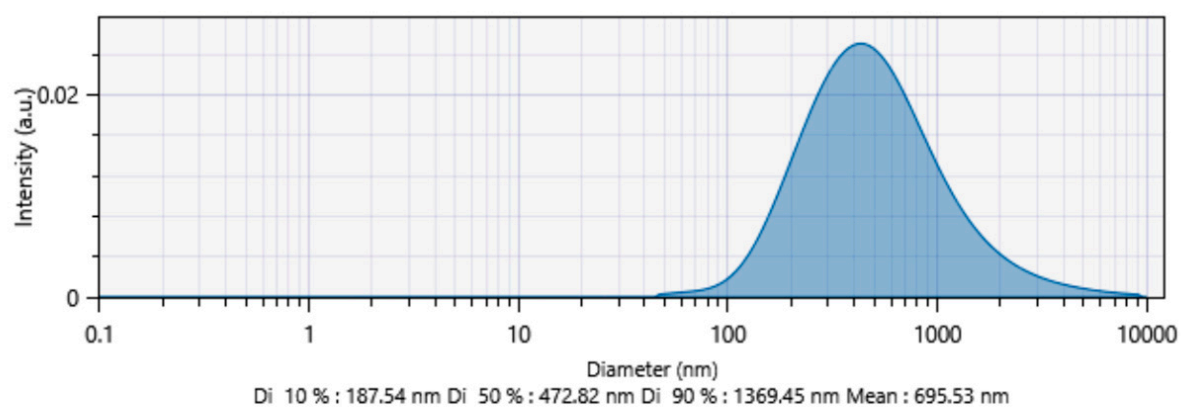

(a)

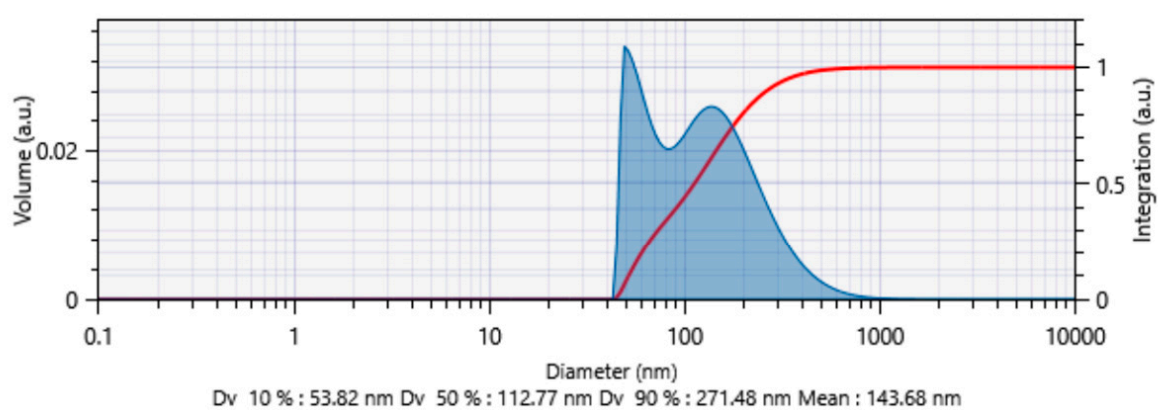

(b)

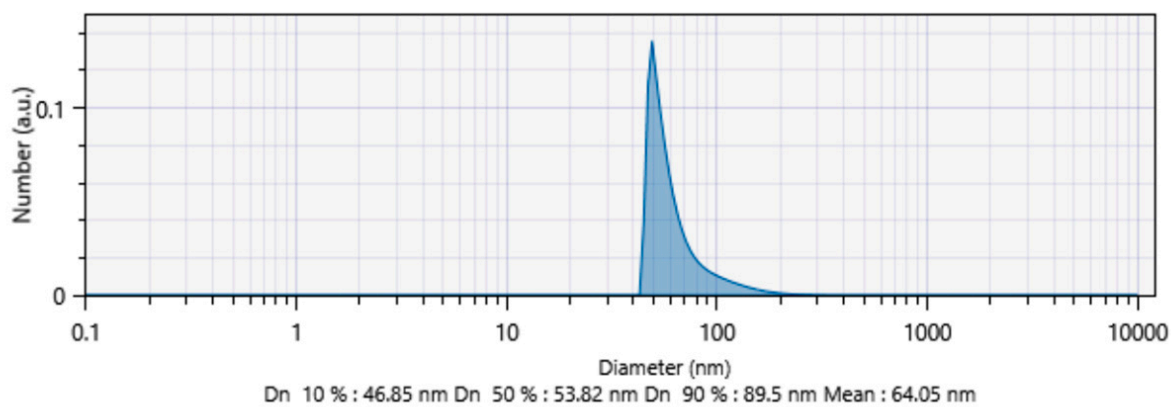

(c)

**Figure S3.** DLS analysis of SeNPs: (a) Intensity; (b) Volume; (c) Number.

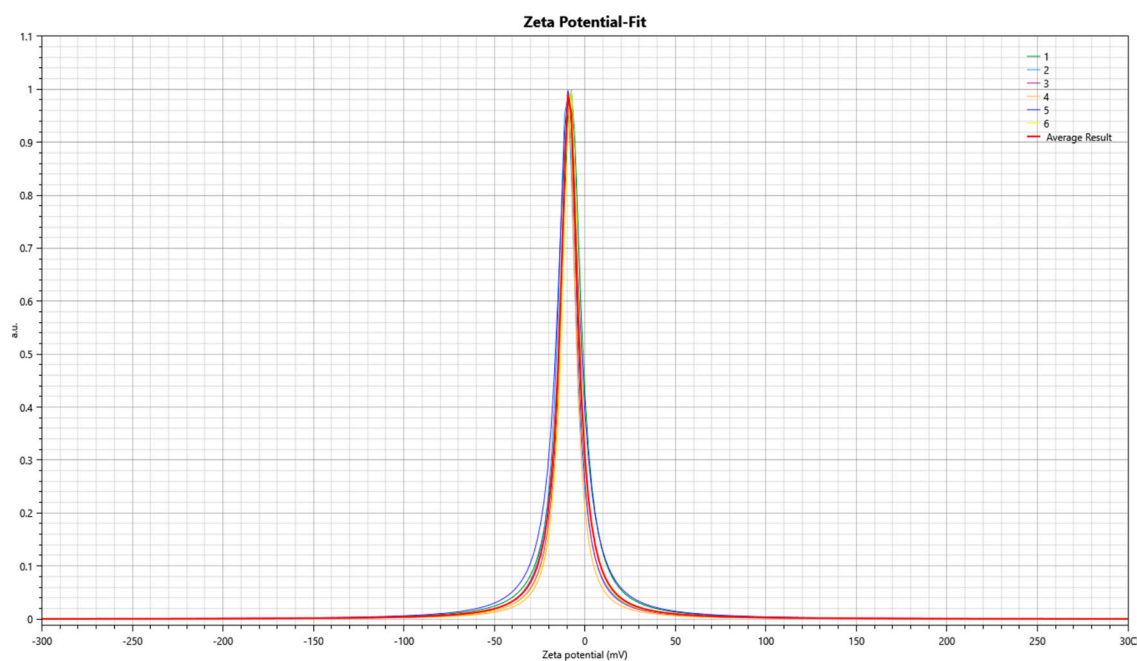

**Figure S4.** Zeta potential analysis of SeNPs.

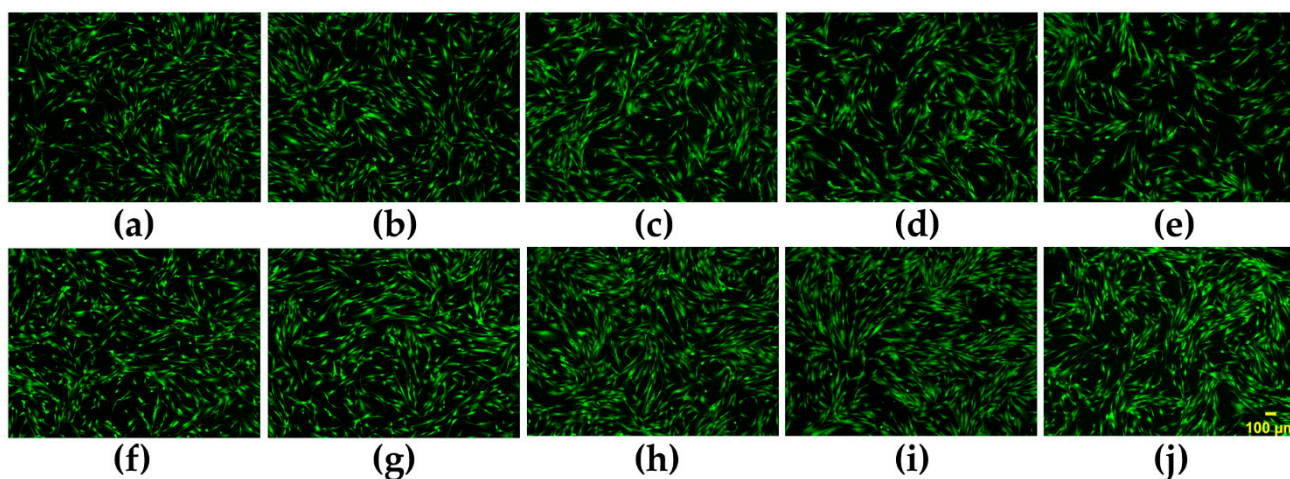

**Figure S5.** Biocompatibility of Kombucha beverage: (a–j) LIVE/DEAD assay (live cells – green fluorescence, dead cells – red fluorescence): (a) 0.1 mg/mL KPol5; (b) 1 mg/mL KPol5; (c) 3 mg/mL KPol5; (d) 5 mg/mL KPol5; (e) 7 mg/mL KPol5; (f) 0.1 mg/mL KPol15; (g) 1 mg/mL KPol15; (h) 3 mg/mL KPol15; (i) 5 mg/mL KPol15; (j) 7 mg/mL KPol15; KPol5 – Kombucha beverage with 30 mL SCOBY, 5 g pollen, and 190 mg sodium selenite; KPol15 – Kombucha beverage with 30 mL SCOBY, 15 g pollen, and 190 mg sodium selenite.

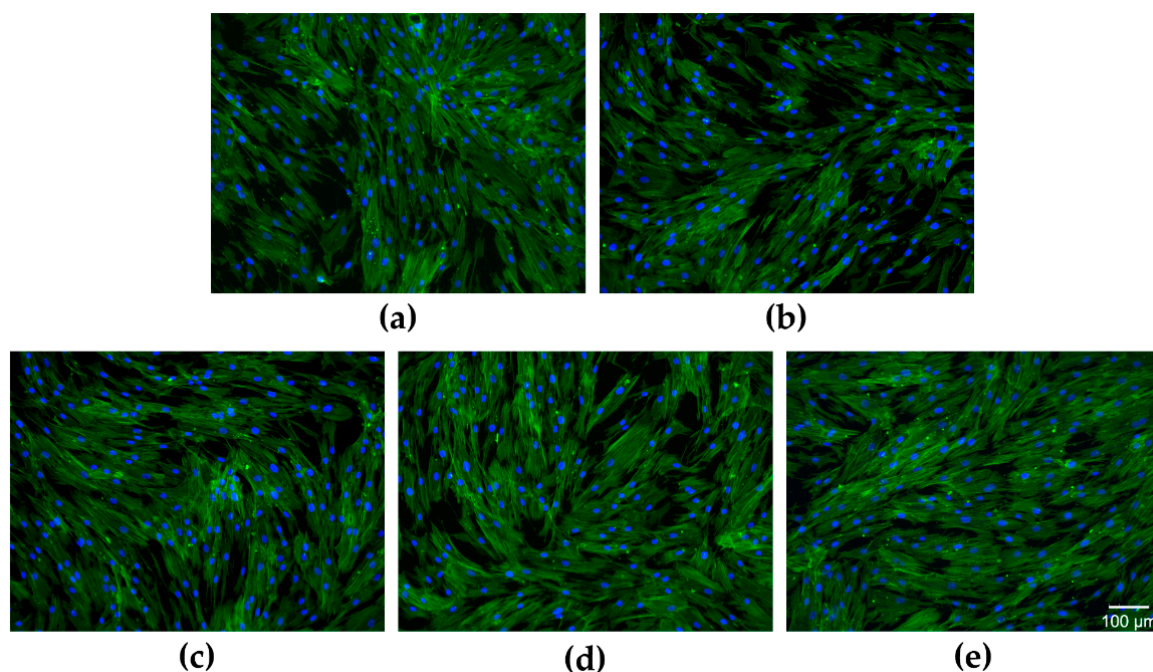

**Figure S6.** Cell morphology – Fluorescence microscopy images after labelling the actin cytoskeleton with Alexa Fluor 488-coupled phalloidin (green fluorescence), and the nuclei with DAPI (blue fluorescence): (a) Untreated cells (C-; Negative cytotoxicity control); HGF-1 cells treated with: (b) 3 mg/mL K; (c) 3 mg/mL KPol5; (d) 5 mg/mL KPol15; (e) 7 mg/mL KPol25; K – Kombucha beverage with 30 mL SCOBY; KPol5 – Kombucha beverage with 30 mL SCOBY, 5 g pollen, and 190 mg sodium selenite; KPol15 – Kombucha beverage with 30 mL SCOBY, 15 g pollen, and 190 mg sodium selenite, KPol25 – Kombucha beverage with 30 mL SCOBY, 25 g pollen, and 190 mg sodium selenite.

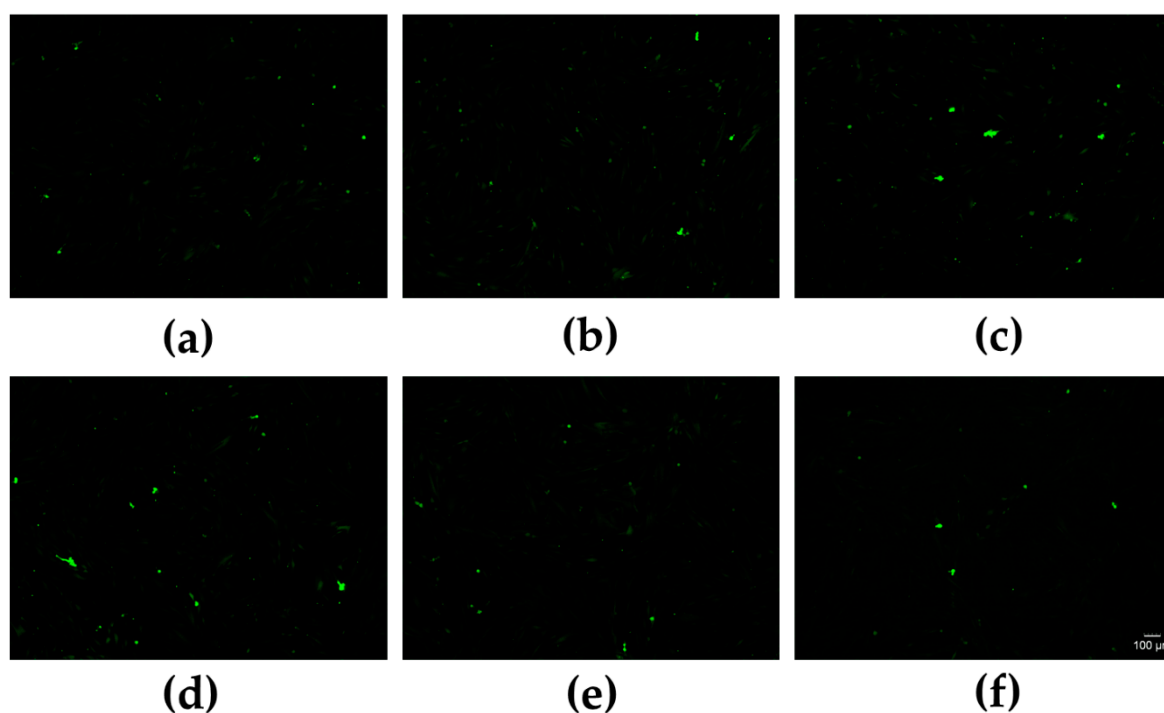

**Figure S7.** In vitro antioxidant activity of Kombucha beverage: (a-f) Fluorescence microscopy images after labelling total intracellular ROS with H<sub>2</sub>DCFDA (green fluorescence): (a) 3 mg/mL KPol5; (b) 5 mg/mL KPol5; (c) 7 mg/mL KPol5; (d) 3 mg/mL KPol15; (e) 5 mg/mL KPol15; (f) 7 mg/mL KPol15; KPol5 – Kombucha beverage with 30 mL SCOBY, 5 g pollen, and 190 mg sodium selenite; KPol15 – Kombucha beverage with 30 mL SCOBY, 15 g pollen, and 190 mg sodium selenite.

**Table S5.** EDX analysis of fresh polyfloral pollen (P).

| Element | Weight % | $\sigma$ |
|---------|----------|----------|
| C       | 62.8     | 0.8      |
| O       | 35.6     | 0.8      |
| Al      | 0.8      | 0.1      |
| K       | 0.4      | 0.1      |
| P       | 0.2      | 0.1      |

**Table S6.** EDX analysis of PK.

| Element | Weight % | $\sigma$ |
|---------|----------|----------|
| C       | 64.8     | 0.7      |
| O       | 32.6     | 0.6      |
| N       | 2.6      | 0.8      |

**Table S7.** EDX analysis of PK25.

| Element | Weight % | $\sigma$ |
|---------|----------|----------|
| C       | 67.0     | 0.5      |
| O       | 30.6     | 0.4      |
| Se      | 2.5      | 0.3      |

**Table S8.** EDX analysis of BCK.

| Element | Weight % | $\sigma$ |
|---------|----------|----------|
| C       | 56.7     | 0.3      |
| O       | 41.8     | 0.3      |
| Al      | 0.6      | 0.0      |
| P       | 0.5      | 0.0      |
| S       | 0.2      | 0.0      |
| Ca      | 0.2      | 0.0      |
| K       | 0.1      | 0.0      |

**Table S9.** EDX analysis of BCKPol5.

| Element | Weight % | $\sigma$ |
|---------|----------|----------|
| O       | 54.2     | 0.4      |
| C       | 45.3     | 0.4      |
| Al      | 0.4      | 0.0      |

**Table S10.** EDX analysis of BCKPol15.

| Element | Weight % | $\sigma$ |
|---------|----------|----------|
| C       | 52.4     | 0.5      |
| O       | 45.9     | 0.5      |
| P       | 0.5      | 0.0      |
| Al      | 0.4      | 0.0      |
| K       | 0.3      | 0.0      |
| S       | 0.2      | 0.0      |
| Ca      | 0.2      | 0.0      |
| Na      | 0.2      | 0.0      |

**Table S11.** EDX analysis of BCKPol25.

| Element | Weight % | $\sigma$ |
|---------|----------|----------|
| C       | 51.2     | 0.4      |
| O       | 46.7     | 0.4      |
| K       | 0.6      | 0.0      |
| Al      | 0.6      | 0.0      |
| P       | 0.4      | 0.0      |
| Ca      | 0.2      | 0.0      |
| Se      | 0.2      | 0.1      |
| S       | 0.2      | 0.0      |

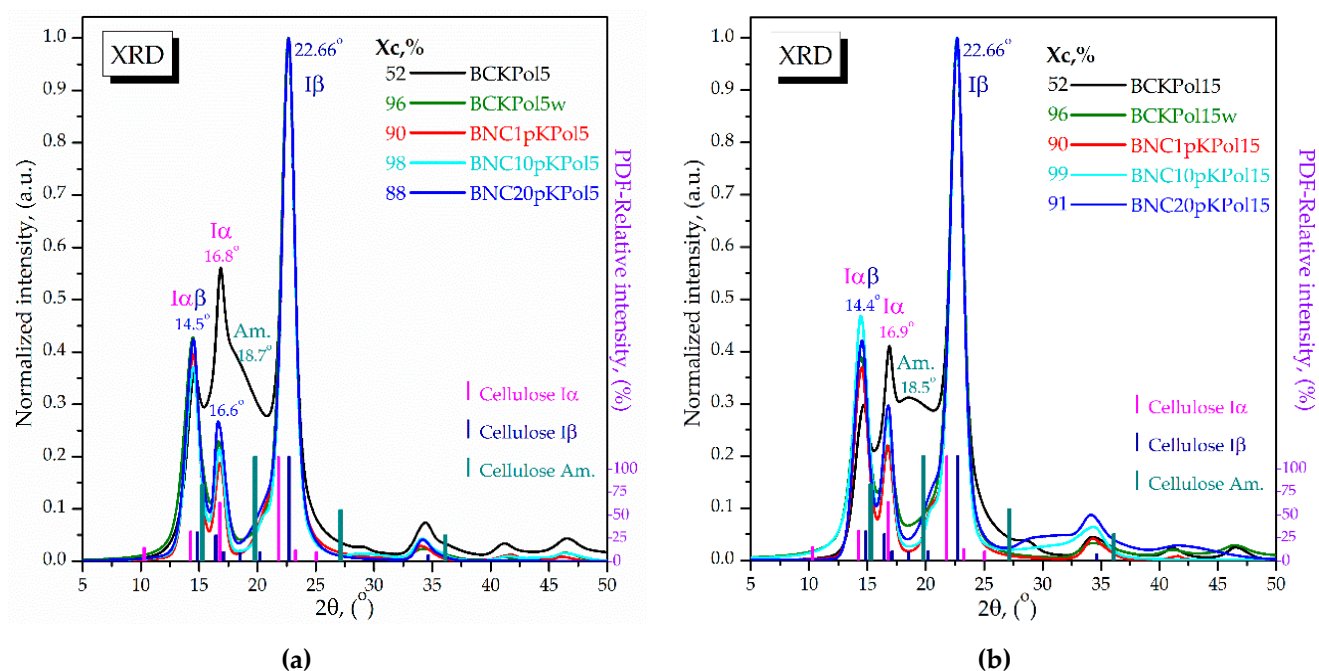

**Figure S8.** XRD analyses of bacterial celluloses membranes (BC) obtained by purification and microfluidization: (a) BCKPol5 – Bacterial cellulose from Kombucha beverage prepared with 30 mL SCOBY, 5 g pollen, and 190 mg sodium selenite; BCKPol5w – Purified/washed bacterial cellulose; BNC1pKPol5 – Bacterial nanocellulose after 1 pass of microfluidization; BNC10pKPol5 – Bacterial nanocellulose after 10 passes of microfluidization; BNC20pKPol5 – Bacterial nanocellulose after 20 passes of microfluidization; (b) BCKPol15 – Bacterial cellulose from Kombucha beverage prepared with 30 mL SCOBY, 15 g pollen, and 190 mg of sodium selenite; BCKPol15w – Purified/washed bacterial cellulose; BNC1pKPol15 – Bacterial nanocellulose after 1 pass of microfluidization; BNC10pKPol15 – Bacterial nanocellulose after 10 passes of microfluidization; BNC20pKPol15 – Bacterial nanocellulose after 20 passes of microfluidization. The purification of BCKPol5 and BCKPol15 increases the crystallinity degree from 52% to 96% in washed membranes (w), while 10 passes of microfluidization induce a partial arrangement of amorphous cellulose into a I $\alpha$  $\beta$  structure, as suggested by the increased intensity of the I $\alpha$  $\beta$  peak around 14.5° and increased crystallinity up to 98-99%. Subsequent microfluidization up to 20 passes shortens the cellulose microfibrils and partially disintegrate the I $\alpha$  and I $\alpha$  $\beta$  structure into amorphous cellulose, decreasing the crystallinity degree to 88% for BNC20pKPol5, respectively 91% for BNC20pKPol15.

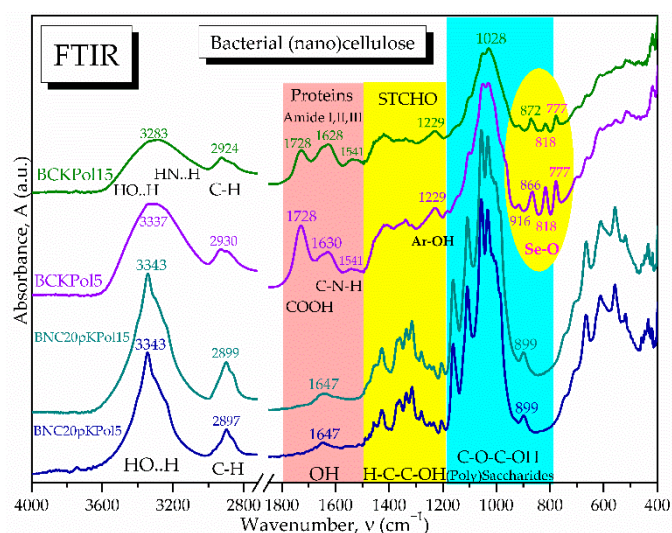

**Figure S9.** ATR-FTIR spectra of initial membranes of bacterial celluloses (BC) compared with the corresponding bacterial nanocelluloses (BNC) obtained by purification and microfluidization; BCKPol5 – Bacterial cellulose from Kombucha beverage prepared with 30 mL SCOBY, 5 g pollen, and 190 mg sodium selenite; BNC20pKPol5 – Bacterial nanocellulose after 20 passes of microfluidization; BCKPol15 – Bacterial cellulose from Kombucha beverage prepared with 30 mL SCOBY, 15 g pollen, and 190 mg of sodium selenite; BNC20pKPol15 – Bacterial nanocellulose after 20 passes of microfluidization.

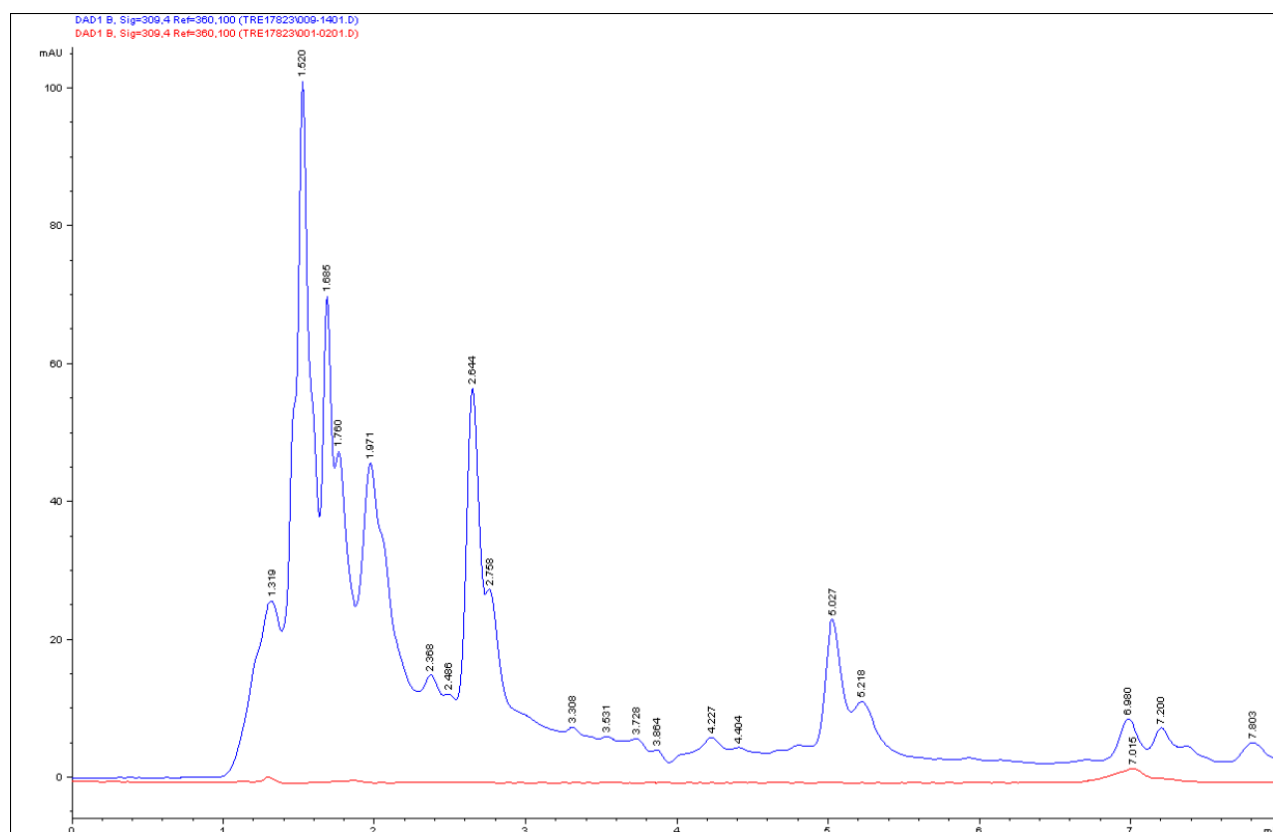

**Figure S10.** HPLC-DAD chromatogram analysis of black tea (blue) and t-resveratrol reference material (red); t-resveratrol ( $t_r = 7.015$  min for reference material,  $t_r = 6.980$  min. for sample;  $\lambda = 309$  nm)

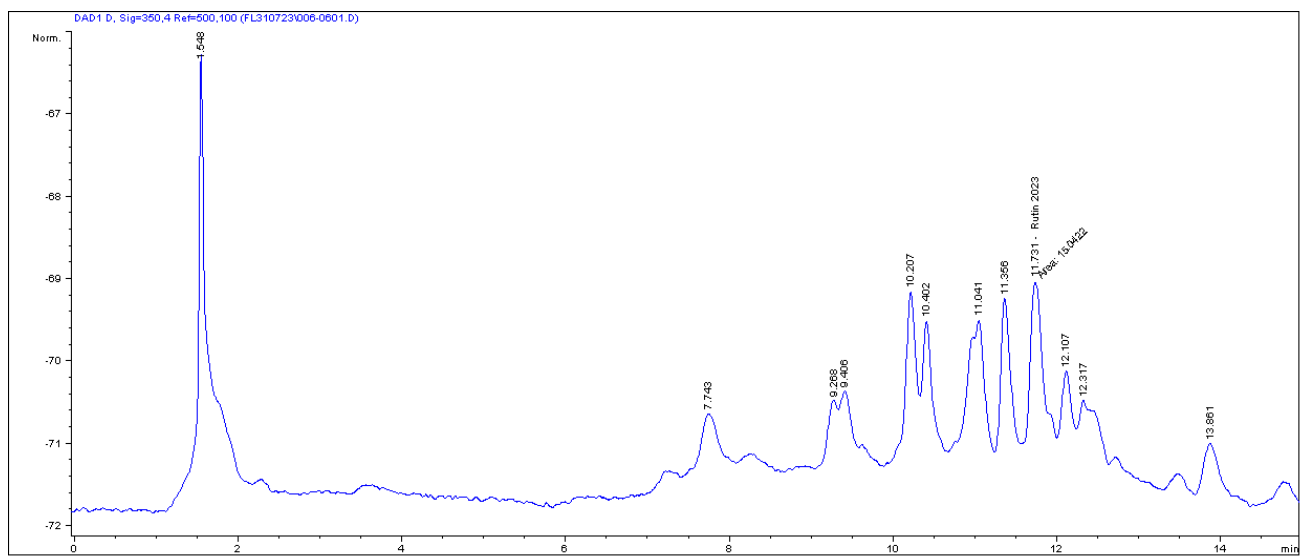

**Figure 11.** HPLC-DAD chromatogram analysis of black tea sample: quercetin-3-rutinoside ( $t_r = 11.73$  min,  $\lambda = 350$  nm)
